# Supplementary material for: Carbon nano horn and bovine serum albumin hierarchical composite: towards bio-friendly superhydrophobic protein film surfaces
Source: Royal Society of Chemistry journal article supplement (doi:10.1039/b806777e), 2008-01-01
Supplement: b806777e.pdf [file b806777e.pdf]

## Electronic Supporting Information

### **Carbon Nanohorn and Bovine Serum Albumin Hierarchical composite: Towards Bio-Friendly Super-Hydrophobic Protein Film Surfaces**

Anil D. Jadhav, Satish B. Ogale\* and B. L. V. Prasad\*

Physical and Materials Chemistry Division, National Chemical Laboratory

Pune-411008, India.

Email: [sb.ogale@ncl.res.in](mailto:sb.ogale@ncl.res.in), [pl.bhagavatula@ncl.res.in](mailto:pl.bhagavatula@ncl.res.in)

Tel: +91 20 25902013 Fax: +91 20 25902636

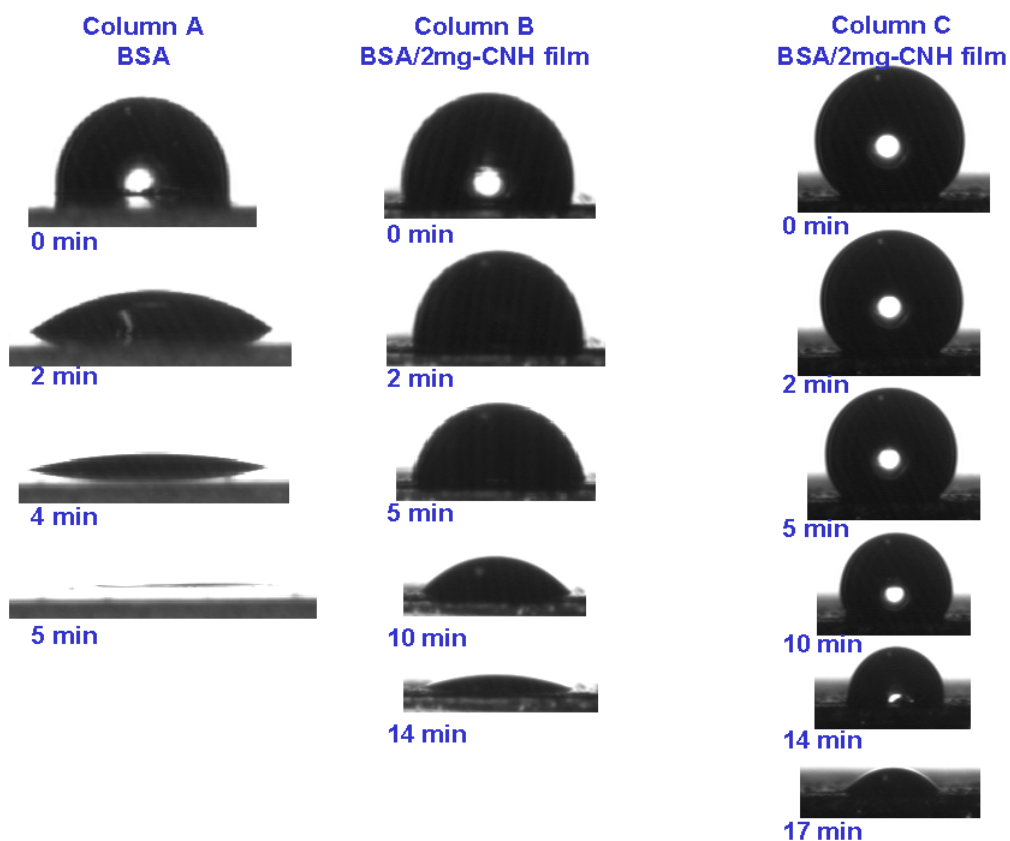

**S1:** Time dependent droplet images of substrates treated with BSA (**column A**), BSA (3mg/mL)-carbon nano horn (2mg/mL) sample (**column B**) and BSA (3mg/mL)-carbon nano horn (4mg/mL) sample (**column C**).
